# Supplementary material for: DNA methylation in peripheral blood leukocytes for the association with glucose metabolism and invasive breast cancer
Source: PubMed Central journal article supplement (PMC9926571; doi:10.1186/s13148-023-01435-7), 2023-02-13

Table S1. Summary of the leukocyte proportions

|                    | CD8T             | CD4T             | Natural killer cell | B cell           | monocyte         | granulocyte      |
|--------------------|------------------|------------------|---------------------|------------------|------------------|------------------|
|                    | <u>Mean (SD)</u> | <u>Mean (SD)</u> | <u>Mean (SD)</u>    | <u>Mean (SD)</u> | <u>Mean (SD)</u> | <u>Mean (SD)</u> |
| Discovery dataset  | 9.50 (7.64)      | 21.30 (7.26)     | 2.70 (2.69)         | 4.30 (3.54)      | 12.90 (3.27)     | 52.80 (12.93)    |
| Validation dataset | 4.90 (4.98)      | 21.70 (7.92)     | 9.70 (5.87)         | 8.20 (3.41)      | 8.90 (3.04)      | 51.90 (13.27)    |

Table S2. Genome-wide scan of DNA methylation for an association with fasting glucose concentrations (as a categorical variable)

| Chr   | CpG site§  | Position  | Discovery                | Validation               | P               | Meta-analysis            |                 |                  | CpG context | Gene         | Gene region |
|-------|------------|-----------|--------------------------|--------------------------|-----------------|--------------------------|-----------------|------------------|-------------|--------------|-------------|
|       |            |           | OR†¶ (95% CI)            | OR¶ (95% CI)             |                 | OR (95% CI)              | P               | P <sub>Q</sub> ‡ |             |              |             |
| Chr1  | cg19693031 | 145441552 | <b>0.37 (0.27, 0.49)</b> | <b>0.09 (0.02, 0.28)</b> | <b>9.70E-05</b> | <b>0.34 (0.26, 0.45)</b> | <b>3.77E-14</b> | 0.027            | OpenSea     | <i>TXNIP</i> | 3'UTR       |
| Chr11 | cg00574958 | 68607622  | <b>0.36 (0.26, 0.47)</b> | 0.71 (0.25, 1.94)        | 0.505           | <b>0.37 (0.28, 0.50)</b> | <b>6.44E-12</b> | 0.197            | N Shore     | <i>CPT1A</i> | 5'UTR       |

Chr, chromosome; CI, confidence interval; CpG, CpG dinucleotide; OR, odds ratio; UTR, untranslated region. Numbers in bold face are statistically significant.

§ Annotation used R v.0.6.0.*IlluminaHumanMethylation450kanno.ilmn12.hg19: Annotation for Illumina's 450k methylation arrays.*

† Each effect size of the CpGs in the discovery stage was at the epigenome-wide significance level ( $p < 1E-007$ ).

¶ Effect size adjusted by age and leukocyte heterogeneities (CD8<sup>+</sup>CD28<sup>-</sup>CD45RA<sup>-</sup> T cell, naïve CD8 T cell, plasma blast, CD4<sup>+</sup> T cell, natural killer cell, monocyte, and granulocyte).

‡  $p$  value for Cochran's Q.

Table S3. Genome-wide scan of DNA methylation for an association with fasting insulin concentrations (as a categorical variable)

| Chr   | CpG site§   | Position | Discovery                | Validation               | P            | Meta-analysis            |                 |                  | CpG context | Gene         | Gene region |
|-------|-------------|----------|--------------------------|--------------------------|--------------|--------------------------|-----------------|------------------|-------------|--------------|-------------|
|       |             |          | OR†¶ (95% CI)            | OR¶ (95% CI)             |              | OR (95% CI)              | P               | P <sub>Q</sub> ‡ |             |              |             |
| Chr11 | cg00574958  | 68607622 | <b>0.50 (0.38, 0.65)</b> | <b>0.30 (0.10, 0.80)</b> | <b>0.019</b> | <b>0.48 (0.38, 0.62)</b> | <b>1.87E-08</b> | 0.332            | N Shore     | <i>CPT1A</i> | 5'UTR       |
| Chr15 | cg06192883* | 52554171 | <b>2.25 (1.67, 3.02)</b> | 1.49 (0.51, 4.31)        | 0.463        | <b>2.18 (1.64, 2.89)</b> | <b>7.56E-08</b> | 0.460            | OpenSea     | <i>MYO5C</i> | Body        |

Chr, chromosome; CI, confidence interval; CpG, CpG dinucleotide; OR, odds ratio; UTR, untranslated region. Numbers in bold face are statistically significant.

§ Annotation used R v.0.6.0.*IlluminaHumanMethylation450kanno.ilmn12.hg19*: Annotation for Illumina's 450k methylation arrays.

† Each effect size of the CpGs in the discovery stage was at the epigenome-wide significance level ( $p < 1E-007$ ).

¶ Effect size adjusted by age and leukocyte heterogeneities (CD8<sup>+</sup>CD28<sup>-</sup>CD45RA<sup>-</sup> T cell, naïve CD8 T cell, plasma blast, CD4<sup>+</sup> T cell, natural killer cell, monocyte, and granulocyte).

‡ P value for Cochran's Q.

\* Enhancer associated.

Table S4. Genome-wide scan of DNA methylation for an association with fasting level of HOMA-IR (as a categorical variable)

| Chr   | CpG site§   | Position  | Discovery                |                   |       | Validation               |                 |                  | Meta-analysis |               |        | CpG context | Gene | Gene region |
|-------|-------------|-----------|--------------------------|-------------------|-------|--------------------------|-----------------|------------------|---------------|---------------|--------|-------------|------|-------------|
|       |             |           | OR†¶ (95% CI)            | OR¶ (95% CI)      | P     | OR (95% CI)              | P               | P <sub>Q</sub> ‡ |               |               |        |             |      |             |
| Chr1  | cg14476101  | 120255992 | <b>0.43 (0.32, 0.58)</b> | 0.70 (0.22, 2.23) | 0.544 | <b>0.63 (0.49, 0.81)</b> | <b>2.86E-04</b> | 0.840            | S Shore       | <i>PHGDH</i>  | Body   |             |      |             |
| Chr1  | cg19693031  | 145441552 | <b>0.42 (0.32, 0.56)</b> | 0.30 (0.10, 0.86) | 0.029 | <b>0.62 (0.48, 0.80)</b> | <b>2.18E-04</b> | 0.174            | OpenSea       | <i>TXNIP</i>  | 3'UTR  |             |      |             |
| Chr6  | cg01254034  | 28543667  | <b>2.10 (1.58, 2.79)</b> | 1.30 (0.47, 3.62) | 0.611 | <b>1.42 (1.11, 1.83)</b> | <b>5.54E-03</b> | 0.856            | OpenSea       | <i>SCAND3</i> | Body   |             |      |             |
| Chr11 | cg00574958  | 68607622  | <b>0.40 (0.30, 0.53)</b> | 0.53 (0.18, 1.50) | 0.238 | <b>0.50 (0.39, 0.65)</b> | <b>9.89E-08</b> | 0.915            | N Shore       | <i>CPT1A</i>  | 5'UTR  |             |      |             |
| Chr13 | cg02714303  | 76334728  | <b>0.43 (0.31, 0.58)</b> | 0.61 (0.19, 1.88) | 0.391 | <b>0.69 (0.53, 0.90)</b> | <b>6.04E-03</b> | 0.825            | OpenSea       | <i>LMO7</i>   | TSS200 |             |      |             |
| Chr13 | cg19750657  | 38935967  | <b>2.45 (1.82, 3.33)</b> | 0.81 (0.27, 2.44) | 0.705 | <b>1.57 (1.20, 2.05)</b> | <b>9.35E-04</b> | 0.222            | OpenSea       | <i>UFMI</i>   | 3'UTR  |             |      |             |
| Chr21 | cg06500161* | 43656587  | <b>2.09 (1.58, 2.77)</b> | 1.87 (0.65, 5.66) | 0.252 | <b>1.83 (1.42, 2.35)</b> | <b>2.27E-06</b> | 0.966            | S Shore       | <i>ABCG1</i>  | Body   |             |      |             |

Chr, chromosome; CI, confidence interval; CpG, CpG dinucleotide; HOMA-IR, homeostatic model assessment–insulin resistance; OR, odds ratio; TSS200, 0–200 bp upstream of transcription start site; UTR, untranslated region. Numbers in bold face are statistically significant.

§ Annotation used R v.0.6.0.*IlluminaHumanMethylation450kanno.ilmn12.hg19: Annotation for Illumina's 450k methylation arrays.*

† Each effect size of the CpGs in the discovery stage was at the epigenome-wide significance level ( $p < 1E-007$ ).

¶ Effect size adjusted by age and leukocyte heterogeneities (CD8<sup>+</sup>CD28<sup>-</sup>CD45RA<sup>-</sup> T cell, naïve CD8 T cell, plasma blast, CD4<sup>+</sup> T cell, natural killer cell, monocyte, and granulocyte).

‡ P value for Cochran's Q.

\* Enhancer associated.

**Method of Interest - Over-Representation Analysis (ORA)**

|                                | <b>Glu (n=35)</b><br>20 cpgs from lm and 20 from lgm                                                                                                                                                   | <b>Ins (n=36)</b><br>20 cpgs from lm and 20 from lgm                                                                                                                                                                                             | <b>IR (n=43)</b><br>35 cpgs from lm and 20 from lgm                                                                                                                                  | <b>Altogether (n=84)</b><br>35 glu, 36 ins, and 43 ir                                                                                                                                                                                                                   |
|--------------------------------|--------------------------------------------------------------------------------------------------------------------------------------------------------------------------------------------------------|--------------------------------------------------------------------------------------------------------------------------------------------------------------------------------------------------------------------------------------------------|--------------------------------------------------------------------------------------------------------------------------------------------------------------------------------------|-------------------------------------------------------------------------------------------------------------------------------------------------------------------------------------------------------------------------------------------------------------------------|
| <b>GO - biological process</b> | <p><b>Sig</b> - regulation of small molecular metabolic process</p> <p><b>Sig</b> - positive regulation of catabolic process</p>                                                                       |                                                                                                                                                                                                                                                  | <p><b>Sig</b> - regulation of small molecular metabolic process</p> <p>Other metabolic process (cellular modified amino acid, steroid)</p>                                           | <p><b>(Table S4.5) Sig</b> - beta-catenin-TCF complex assembly (dysregulation ass w/ cancer, such as CRC)</p> <p>Other metabolic process (regulation of small molecular metabolic process, steroid metabolic process, and positive regulation of catabolic process)</p> |
| <b>GO - cellular component</b> |                                                                                                                                                                                                        |                                                                                                                                                                                                                                                  |                                                                                                                                                                                      |                                                                                                                                                                                                                                                                         |
| <b>GO - molecular function</b> |                                                                                                                                                                                                        |                                                                                                                                                                                                                                                  | Carbohydrate kinase activity                                                                                                                                                         | Carbohydrate kinase activity                                                                                                                                                                                                                                            |
| <b>Pathway - KEGG</b>          | <p>Glucose biosynthesis (glycosaminoglycan biosynthesis, Fructose/mannose metabolism, AMPK signaling pathway)</p> <p>Insulin resistance</p> <p>Fat metabolism (Fatty acid degradation; metabolism)</p> | <p><b>(Table S4.2)</b> Insulin resistance, Cancers (miRNAs in cancer, Transcriptional misregulation in cancer, AML, Thyroid cancer, SCLC, Bladder cancer)</p> <p>Fat (Steroid biosynthesis; Ferroptosis)</p>                                     | <p>Glucose metabolism (Fructose and mannose metabolism; AMPK signaling pathway)</p> <p>Insulin resistance</p> <p>Fat (Steroid biosynthesis; Ferroptosis, Fatty acid degradation)</p> | <p><b>(Table S4.6)</b> Insulin resistance; glucose uptake (AMPK signaling)</p> <p>Cancer (SCLC, leukemia, Transcriptional misregulation in cancer)</p> <p>Fat (Steroid biosynthesis)</p>                                                                                |
| <b>Pathway - Reactome</b>      | <p>Cellular signaling (AKT2 activation; Repression of WNT target genes)</p>                                                                                                                            | <p><b>(Table S4.3)</b> Cellular signaling (RSK activation [downstream effector of RAS/MAPK, ass with cancer], WNT signaling)</p> <p>Transcription factor (AP-2 family [ass with cancer], CREB; ChREBP)</p> <p>Fat (Cholesterol biosynthesis)</p> | <p>Cellular signaling (RSK, ERK2, ERK1)</p> <p>Fat (cholesterol biosynthesis, HDL)</p> <p>Immune (IL-23; IL-27)</p>                                                                  | <p><b>(Table S4.7)</b> Insulin resistance cellular signaling (AKT2, RSK activation)</p> <p>Cancer (AP-2 family, Formation of the beta-catenin: TCF transactivating complex)</p> <p>Fat (Cholesterol biosynthesis)</p>                                                   |
| <b>Disease - Disgenet</b>      | <p>Hypoketotic hypoglycemia</p> <p>Auto-immune (kidney failure, chronic; Rheumatoid Arthritis)</p>                                                                                                     | <p>Phyllodes Tumor (rare breast tumor)</p> <p>Kidney failure, chronic</p>                                                                                                                                                                        | <p>Adrenocorticotrophic hormone excess</p> <p>Phyllodes Tumor</p> <p>Kidney Failure, Chronic</p>                                                                                     | <p>Cancer (Bladder Neoplasm)</p> <p>Auto-immune (kidney failure, chronic; Rheumatoid Arthritis)</p>                                                                                                                                                                     |
| <b>Disease - GLAD4U</b>        | <p><b>(Table S4.1)</b> Diabetic Nephropathies, Insulin Resistance, Diabetes Mellitus, Obesity, Nutritional and Metabolic Diseases</p>                                                                  | <p>Cancers (lymphoma, leukemia, teratocarcinoma, CNS neoplasms, brain neoplasm)</p>                                                                                                                                                              | <p><b>(Table S4.4)</b> Nutritional and Metabolic Disease</p> <p>Fat (Sitosterolemia)</p>                                                                                             | <p>Cancer (Hemangiosarcoma, Leukemia)</p>                                                                                                                                                                                                                               |

Table S5.1. Gene set analysis using GLAD4U v. 2.5: diseases with enrichment of genes that display differential DNAm at the EWA significance for the FG of PBMcs

| GeneSet     | Description                        | Gene set size | Expected value | Enrichment ratio | p value     | Overlapped genes               |
|-------------|------------------------------------|---------------|----------------|------------------|-------------|--------------------------------|
| PA443382    | Anoxia                             | 211           | 0.250646356    | 11.96905492      | 0.001844513 | <i>TXNIP;PFKFB3;TRIB3</i>      |
| PA444626    | Insulin Resistance                 | 248           | 0.294598561    | 10.18334915      | 0.002920836 | <i>TXNIP;CPT1A;TRIB3</i>       |
| PA443893    | Diabetic Nephropathies             | 98            | 0.116413947    | 17.18007203      | 0.005903772 | <i>TXNIP;XYLT1</i>             |
| PA166123204 | bioavailability                    | 103           | 0.122353434    | 16.34608795      | 0.006502142 | <i>TXNIP;ABCG1</i>             |
| PA153619780 | Sitosterolemia                     | 6             | 0.007127385    | 140.3039216      | 0.007107490 | <i>ABCG1</i>                   |
| PA166048726 | Nutritional and Metabolic Diseases | 683           | 0.811333939    | 4.930152442      | 0.007440437 | <i>TXNIP;CPT1A;ABCG1;TRIB3</i> |
| PA444748    | Lesch-Nyhan Syndrome               | 7             | 0.008315282    | 120.2605042      | 0.008287439 | <i>NKPD1</i>                   |
| PA443886    | Diabetes Mellitus                  | 367           | 0.435958354    | 6.881391249      | 0.008707050 | <i>TXNIP;ABCG1;TRIB3</i>       |
| PA445131    | Obesity                            | 367           | 0.435958354    | 6.881391249      | 0.008707050 | <i>CPT1A;ABCG1;TRIB3</i>       |
| PA443365    | Angioid Streaks                    | 8             | 0.009503179    | 105.2279412      | 0.009466068 | <i>XYLT1</i>                   |

DNAm, DNA methylation; EWA, epigenome-wide association; FG, fasting glucose; PBMcs, peripheral blood mononuclear cells.

Table S5.2. KEGG pathways with enrichment of genes that display differential DNAm at the EWA significance for the FI of PBMCs

| <b>GeneSet</b> | <b>Description</b>                      | <b>Gene set size</b> | <b>Expected value</b> | <b>Enrichment ratio</b> | <b>p value</b> | <b>Overlapped genes</b> |
|----------------|-----------------------------------------|----------------------|-----------------------|-------------------------|----------------|-------------------------|
| hsa05202       | Transcriptional misregulation in cancer | 179                  | 0.414112              | 7.244413                | 0.007447       | <i>MYC;TRAF1;RARA</i>   |
| hsa05221       | Acute myeloid leukemia                  | 64                   | 0.148062              | 13.50781                | 0.009306       | <i>MYC;RARA</i>         |
| hsa05222       | Small cell lung cancer                  | 91                   | 0.210526              | 9.50000                 | 0.018229       | <i>MYC;TRAF1</i>        |
| hsa04931       | Insulin resistance                      | 106                  | 0.245228              | 8.15566                 | 0.024278       | <i>RPS6KA2;CPT1A</i>    |
| hsa00100       | Steroid biosynthesis                    | 17                   | 0.039329              | 25.42647                | 0.038653       | <i>DHCR24</i>           |
| hsa05206       | MicroRNAs in cancer                     | 155                  | 0.358589              | 5.577419                | 0.048762       | <i>MYC;MMP16</i>        |
| hsa00020       | Citrate cycle (TCA cycle)               | 28                   | 0.064777              | 15.43750                | 0.062913       | <i>ACLY</i>             |
| hsa04216       | Ferroptosis                             | 37                   | 0.085599              | 11.68243                | 0.082334       | <i>SLC7A11</i>          |
| hsa05216       | Thyroid cancer                          | 37                   | 0.085599              | 11.68243                | 0.082334       | <i>MYC</i>              |
| hsa04714       | Thermogenesis                           | 218                  | 0.504338              | 3.965596                | 0.088852       | <i>RPS6KA2;CPT1A</i>    |

DNAm, DNA methylation; EWA, epigenome-wide association; FI, fasting insulin; PBMCs, peripheral blood mononuclear cells.

Table S5.3. Reactome pathways with enrichment of genes that display differential DNAm at the EWA significance for the FI of PBMCs

| GeneSet       | Description                                                       | Gene set size | Expected value | Enrichment ratio | p value     | Overlapped genes      |
|---------------|-------------------------------------------------------------------|---------------|----------------|------------------|-------------|-----------------------|
| R-HSA-5362517 | Signaling by Retinoic Acid                                        | 42            | 0.070960048    | 28.18487395      | 0.002223243 | <i>CPT1A;RARA</i>     |
| R-HSA-9006931 | Signaling by Nuclear Receptors                                    | 189           | 0.319320215    | 9.394957983      | 0.003652756 | <i>MYC;CPT1A;RARA</i> |
| R-HSA-6807047 | Cholesterol biosynthesis via desmosterol                          | 3             | 0.005068575    | 197.2941176      | 0.005060518 | <i>DHCR24</i>         |
| R-HSA-6807062 | Cholesterol biosynthesis via lathosterol                          | 3             | 0.005068575    | 197.2941176      | 0.005060518 | <i>DHCR24</i>         |
| R-HSA-8866911 | TFAP2 (AP-2) family regulates transcription of cell cycle factors | 5             | 0.008447625    | 118.3764706      | 0.008420796 | <i>MYC</i>            |
| R-HSA-444257  | RSK activation                                                    | 6             | 0.01013715     | 98.64705882      | 0.010096927 | <i>RPS6KA2</i>        |
| R-HSA-199920  | CREB phosphorylation                                              | 7             | 0.011826675    | 84.55462185      | 0.011770391 | <i>RPS6KA2</i>        |
| R-HSA-163765  | ChREBP activates metabolic gene expression                        | 8             | 0.013516200    | 73.98529412      | 0.013441192 | <i>ACLY</i>           |
| R-HSA-4411364 | Binding of TCF/LEF:CTNNB1 to target gene promoters                | 8             | 0.013516200    | 73.98529412      | 0.013441192 | <i>MYC</i>            |
| R-HSA-8951430 | RUNX3 regulates WNT signaling                                     | 8             | 0.013516200    | 73.98529412      | 0.013441192 | <i>MYC</i>            |

DNAm, DNA methylation; EWA, epigenome-wide association; FI, fasting insulin; PBMCs, peripheral blood mononuclear cells.



Table S5.4. Gene set analysis using GLAD4U v. 2.5: diseases with enrichment of genes that display differential DNAm at the EWA significance for the IR of PBMCs

| GeneSet     | Description                        | Gene set size | Expected value | Enrichment ratio | p value     | Overlapped genes             |
|-------------|------------------------------------|---------------|----------------|------------------|-------------|------------------------------|
| PA443882    | Dermatomyositis                    | 34            | 0.031972284    | 62.55417957      | 4.62E-04    | <i>GARS;TYK2</i>             |
| PA444944    | Microcephaly                       | 178           | 0.167384311    | 17.92282673      | 5.87E-04    | <i>PHGDH;DHCR24;UFM1</i>     |
| PA446477    | Polymyositis                       | 49            | 0.046077704    | 43.40494092      | 9.60E-04    | <i>GARS;TYK2</i>             |
| PA443737    | Cleft Palate                       | 232           | 0.218163821    | 13.75113430      | 0.001264014 | <i>DHCR24;SLC7A11;RARA</i>   |
| PA447188    | Genetic Diseases, Inborn           | 259           | 0.243553576    | 12.31761837      | 0.001733051 | <i>PHGDH;DHCR24;CPT1A</i>    |
| PA166123204 | bioavailability                    | 115           | 0.108141549    | 18.49427918      | 0.005154861 | <i>TXNIP;ABCG1</i>           |
| PA443963    | Dysostoses                         | 117           | 0.110022272    | 18.17813765      | 0.005330557 | <i>POR;SALL1</i>             |
| PA446836    | Craniofacial Abnormalities         | 388           | 0.364860183    | 8.222327727      | 0.005417743 | <i>PHGDH;POR;RARA</i>        |
| PA153619780 | Sitosterolemia                     | 6             | 0.005642168    | 177.2368421      | 0.005629615 | <i>ABCG1</i>                 |
| PA166048726 | Nutritional and Metabolic Diseases | 822           | 0.772976986    | 5.174798310      | 0.006465472 | <i>TXNIP;POR;CPT1A;ABCG1</i> |

DNAm, DNA methylation; EWA, epigenome-wide association; IR, insulin resistance; PBMCs, peripheral blood mononuclear cells.

Table S5.5. Gerontology analysis: biological process with enrichment of genes that display differential DNAm at the EWA significance for either FG, FI, or IR of PBMCs

| GeneSet    | Description                                              | Gene set size | Expected value | Enrichment ratio | p value     | Overlapped genes                            |
|------------|----------------------------------------------------------|---------------|----------------|------------------|-------------|---------------------------------------------|
| GO:1904837 | beta-catenin-TCF complex assembly                        | 28            | 0.071312345    | 42.06845238      | 4.76E-05    | <i>TRRAP;TLE3;MYC</i>                       |
| GO:0062012 | regulation of small molecule metabolic process           | 331           | 0.843013796    | 7.117321249      | 1.70E-04    | <i>SLC7A11;PFKFB3;CPT1A;ABCG1;TRIB3;POR</i> |
| GO:0008202 | steroid metabolic process                                | 288           | 0.733498408    | 6.816647377      | 7.62E-04    | <i>PLEKHA1;ABCG1;DHCR24;ACLY;POR</i>        |
| GO:1902532 | negative regulation of intracellular signal transduction | 478           | 1.217403608    | 4.928521618      | 0.001190877 | <i>SH3BP4;PLEKHA1;TRIB3;MYC;EPHB2;PDE3A</i> |
| GO:0060021 | roof of mouth development                                | 89            | 0.226671383    | 13.23501873      | 0.001482517 | <i>PLEKHA1;EPHB2;COL11A2</i>                |
| GO:0060348 | bone development                                         | 200           | 0.509373895    | 7.852777778      | 0.001607371 | <i>XYLT1;RARA;MMP16;POR</i>                 |
| GO:0048705 | skeletal system morphogenesis                            | 223           | 0.567951892    | 7.042850025      | 0.002390799 | <i>PLEKHA1;RARA;MMP16;POR</i>               |
| GO:0009896 | positive regulation of catabolic process                 | 395           | 1.006013442    | 4.970112518      | 0.003068314 | <i>SH3BP4;PFKFB3;CPT1A;TRIM8;TRIB3</i>      |
| GO:0044091 | membrane biogenesis                                      | 34            | 0.086593562    | 23.09640523      | 0.003361377 | <i>S100A10;EPHB2</i>                        |
| GO:0015711 | organic anion transport                                  | 439           | 1.118075699    | 4.471969122      | 0.004812288 | <i>SH3BP4;SLC7A11;CPT1A;ABCG1;CALHM1</i>    |

DNAm, DNA methylation; EWA, epigenome-wide association; FG, fasting glucose; FI, fasting insulin; IR, insulin resistance; PBMCs, peripheral blood mononuclear cells.

Table S5.6. KEGG pathways with enrichment of genes that display differential DNAm at the EWA significance for either FG, FI, or IR of PBMCs

| GeneSet  | Description                             | Gene set size | Expected value | Enrichment ratio | p value     | Overlapped genes           |
|----------|-----------------------------------------|---------------|----------------|------------------|-------------|----------------------------|
| hsa04931 | Insulin resistance                      | 106           | 0.367842684    | 8.155660377      | 0.005604631 | <i>CPT1A;TRIB3;RPS6KA2</i> |
| hsa02010 | ABC transporters                        | 43            | 0.149219202    | 13.40310078      | 0.009556280 | <i>ABCG1;TAP2</i>          |
| hsa05221 | Acute myeloid leukemia                  | 64            | 0.222093696    | 9.005208333      | 0.020412008 | <i>MYC;RARA</i>            |
| hsa05168 | Herpes simplex infection                | 172           | 0.596876807    | 5.026162791      | 0.020846082 | <i>TAP2;TRAF1;TYK2</i>     |
| hsa05202 | Transcriptional misregulation in cancer | 179           | 0.621168305    | 4.829608939      | 0.023143100 | <i>MYC;TRAF1;RARA</i>      |
| hsa05169 | Epstein-Barr virus infection            | 191           | 0.662810873    | 4.526178010      | 0.027393285 | <i>TAP2;MYC;TYK2</i>       |
| hsa05222 | Small cell lung cancer                  | 91            | 0.315789474    | 6.333333333      | 0.039179463 | <i>MYC;TRAF1</i>           |
| hsa04659 | Th17 cell differentiation               | 105           | 0.36437247     | 5.488888889      | 0.050733318 | <i>RARA;TYK2</i>           |
| hsa00100 | Steroid biosynthesis                    | 17            | 0.058993638    | 16.95098039      | 0.057448598 | <i>DHCR24</i>              |
| hsa04152 | AMPK signaling pathway                  | 116           | 0.402544824    | 4.968390805      | 0.060571410 | <i>PFKFB3;CPT1A</i>        |

DNAm, DNA methylation; EWA, epigenome-wide association; FG, fasting glucose; FI, fasting insulin; IR, insulin resistance; PBMCs, peripheral blood mononuclear cells.

Table S5.7. Reactome pathways with enrichment of genes that display differential DNAm at the EWA significance for either FG, FI, or IR of PBMCs

| GeneSet       | Description                                                       | Gene set size | Expected value | Enrichment ratio | p value     | Overlapped genes           |
|---------------|-------------------------------------------------------------------|---------------|----------------|------------------|-------------|----------------------------|
| R-HSA-201722  | Formation of the beta-catenin:TCF transactivating complex         | 86            | 0.264957265    | 11.32258065      | 0.002279635 | <i>TRRAP;TLE3;MYC</i>      |
| R-HSA-9006931 | Signaling by Nuclear Receptors                                    | 189           | 0.582289803    | 6.869431644      | 0.002551349 | <i>CPT1A;TLE3;MYC;RARA</i> |
| R-HSA-5362517 | Signaling by Retinoic Acid                                        | 42            | 0.129397734    | 15.45622120      | 0.007325768 | <i>CPT1A;RARA</i>          |
| R-HSA-2122947 | NOTCH1 Intracellular Domain Regulates Transcription               | 44            | 0.135559531    | 14.75366569      | 0.008018290 | <i>TLE3;MYC</i>            |
| R-HSA-6807047 | Cholesterol biosynthesis via desmosterol                          | 3             | 0.009242695    | 108.1935484      | 0.009215162 | <i>DHCR24</i>              |
| R-HSA-6807062 | Cholesterol biosynthesis via lathosterol                          | 3             | 0.009242695    | 108.1935484      | 0.009215162 | <i>DHCR24</i>              |
| R-HSA-165158  | Activation of AKT2                                                | 4             | 0.012323594    | 81.14516129      | 0.012268580 | <i>TRIB3</i>               |
| R-HSA-8866911 | TFAP2 (AP-2) family regulates transcription of cell cycle factors | 5             | 0.015404492    | 64.91612903      | 0.015312890 | <i>MYC</i>                 |
| R-HSA-444257  | RSK activation                                                    | 6             | 0.018485391    | 54.09677419      | 0.018348119 | <i>RPS6KA2</i>             |
| R-HSA-1980143 | Signaling by NOTCH1                                               | 69            | 0.212581992    | 9.408134642      | 0.018959443 | <i>TLE3;MYC</i>            |

DNAm, DNA methylation; EWA, epigenome-wide association; FG, fasting glucose; FI, fasting insulin; IR, insulin resistance; PBMCs, peripheral blood mononuclear cells.

**Method of Interest - Over-Representation Analysis (ORA)**

|                                | <b>ER pos</b>                                                                                                                                                                                                                                                               | <b>HER2 neg</b>                                                                                                                                                                                                                  | <b>Altogether (ER, HER2, overall)</b>                                                                                                                                                                                                                         |
|--------------------------------|-----------------------------------------------------------------------------------------------------------------------------------------------------------------------------------------------------------------------------------------------------------------------------|----------------------------------------------------------------------------------------------------------------------------------------------------------------------------------------------------------------------------------|---------------------------------------------------------------------------------------------------------------------------------------------------------------------------------------------------------------------------------------------------------------|
| <b>GO - biological process</b> | Sig – skeletal system morphogenesis                                                                                                                                                                                                                                         | Sig – Fat biosynthetic/metabolic process (cholesterol/sterol/steroid; carnitine metabolic process)                                                                                                                               | Sig – Fat biosynthetic/metabolic process (cholesterol/sterol/steroid)<br><br>Another fat process (carnitine metabolic process)                                                                                                                                |
| <b>GO - cellular component</b> | Histone acetyltransferase (STAGA/SAGA/TFTC plus NuA4/H4/H2A)<br><br>Transcription factor (mRNA/RNA polymerase II/nuclear transcription factor)                                                                                                                              |                                                                                                                                                                                                                                  | Histone acetyltransferase (STAGA/SAGA/TFTC/NuA4/PCAF [ass w/cancer, transcriptional coactivator of p53-genes])<br><br>Transcription factor (mRNA/RNA polymerase II/nuclear transcription factor)                                                              |
| <b>GO - molecular function</b> | Type 1 angiotensin receptor binding<br><br>Growth hormone receptor binding                                                                                                                                                                                                  | Fat metabolic process (carnitine O-acyltransferase/O-palmitoyltransferase activity/lipid-transporting APTase activity)                                                                                                           | Fat metabolic process (carnitine O-acyltransferase/O-palmitoyltransferase activity/lipid-transporting APTase activity)<br><br>Angiotensin receptor binding<br><br>Growth hormone receptor binding                                                             |
| <b>Pathway - KEGG</b>          | Immune-related (Th17/Th1 and Th2 cell differentiation)                                                                                                                                                                                                                      | (Table S4.9) Adipocytokine signaling pathway; glucagon signaling<br><br>Fat (Fatty acid degradation/metabolism)<br><br>Immune (Th17 cell differentiation)                                                                        | Adipocytokine signaling pathway<br><br>Fat (Fatty acid degradation/metabolism)<br><br>Immune (Th17/Th1 and Th2 cell differentiation)                                                                                                                          |
| <b>Pathway - Reactome</b>      | (Table S4.8) Insulin cellular signaling (MAPK1/MAPK3 activation)<br><br>Rap 1 signaling (cell invasion; metastasis in cancers)<br><br>Immune-related (IL6/IL-23/IL-27/IL-35/IFN)<br><br>Transcription factor (ChREBP activates metabolic gene expression, siRNA biogenesis) | Cellular signaling (Rap 1 signaling [playing a role in cancer])<br><br>Fat (HDL remodeling, lipid homeostasis, fatty acid metabolism)<br><br>Transcription factor (ChREBP activates metabolic gene expression, siRNA biogenesis) | (Table S4.11) Insulin cellular signaling (MAPK1/MAPK3 activation)<br><br>Immune-related (IL6/IL-23/IL-27/IL-35)<br><br>Fat (HDL remodeling, fatty acid metabolism)<br><br>Transcription factor (ChREBP activates metabolic gene expression, siRNA biogenesis) |
| <b>Disease - Disgenet</b>      | Adrenocorticotrophic hormone excess<br><br>Phyllodes Tumor<br><br>Neoplasms; bladder neoplasm                                                                                                                                                                               | Adrenocorticotrophic hormone excess<br><br>Phyllodes Tumor<br><br>Neoplasms; kidney failure, chronic                                                                                                                             | Adrenocorticotrophic hormone excess<br><br>Cancer (Phyllodes Tumor, Neoplasms, Bladder neoplasm, Neoplastic cell transformation)                                                                                                                              |
| <b>Disease - GLAD4U</b>        |                                                                                                                                                                                                                                                                             | (Table S4.10) Nutritional and metabolic disease                                                                                                                                                                                  | Nutritional and metabolic disease                                                                                                                                                                                                                             |

Table S5.8. Reactome pathways with enrichment of genes that display differential DNAm shared by PBMCs (in WHI) and BC tissues (in TCGA) among ER/PR pos type

| GeneSet       | Description                                     | Gene set size | Expected value | Enrichment ratio | p value | Overlapped genes |
|---------------|-------------------------------------------------|---------------|----------------|------------------|---------|------------------|
| R-HSA-163765  | ChREBP activates metabolic gene expression      | 8             | 0.0064         | 157.2188         | 0.0063  | <i>ACLY</i>      |
| R-HSA-9020933 | Interleukin-23 signaling                        | 9             | 0.0072         | 139.7500         | 0.0071  | <i>TYK2</i>      |
| R-HSA-112411  | <i>MAPK1 (ERK2)</i> activation                  | 9             | 0.0072         | 139.7500         | 0.0071  | <i>TYK2</i>      |
| R-HSA-110056  | <i>MAPK3 (ERK1)</i> activation                  | 10            | 0.0080         | 125.7750         | 0.0079  | <i>TYK2</i>      |
| R-HSA-9020956 | Interleukin-27 signaling                        | 11            | 0.0087         | 114.3409         | 0.0087  | <i>TYK2</i>      |
| R-HSA-1059683 | Interleukin-6 signaling                         | 11            | 0.0087         | 114.3409         | 0.0087  | <i>TYK2</i>      |
| R-HSA-8984722 | Interleukin-35 signaling                        | 12            | 0.0095         | 104.8125         | 0.0095  | <i>TYK2</i>      |
| R-HSA-392517  | Rap1 signaling                                  | 15            | 0.0119         | 83.8500          | 0.0119  | <i>RAP1GAP2</i>  |
| R-HSA-6788467 | IL-6-type cytokine receptor ligand interactions | 17            | 0.0135         | 73.9853          | 0.0134  | <i>TYK2</i>      |
| R-HSA-912694  | Regulation of IFNA signaling                    | 22            | 0.0175         | 57.1705          | 0.0174  | <i>TYK2</i>      |

BC, breast cancer; DNAm, DNA methylation; ER/PR pos, estrogen/progesterone receptor positive; IFNA, interferon alpha; PBMCs, peripheral blood mononuclear cells; TCGA, The Cancer Genome Atlas; WHI, Women's Health Initiative.

Table S5.9. KEGG pathways with enrichment of genes that display differential DNAm shared by PBMCs (in WHI) and BC tissues (in TCGA) among HER2/neu neg type

| <b>GeneSet</b> | <b>Description</b>                                  | <b>Gene set size</b> | <b>Expected value</b> | <b>Enrichment ratio</b> | <b>p value</b> | <b>Overlapped genes</b> |
|----------------|-----------------------------------------------------|----------------------|-----------------------|-------------------------|----------------|-------------------------|
| hsa00020       | Citrate cycle (TCA cycle)                           | 28                   | 0.0202                | 49.4000                 | 0.0201         | <i>ACLY</i>             |
| hsa00071       | Fatty acid degradation                              | 41                   | 0.0296                | 33.7366                 | 0.0293         | <i>CPT1A</i>            |
| hsa02010       | ABC transporters                                    | 43                   | 0.0311                | 32.1674                 | 0.0307         | <i>ABCG1</i>            |
| hsa01212       | Fatty acid metabolism                               | 45                   | 0.0325                | 30.7378                 | 0.0321         | <i>CPT1A</i>            |
| hsa05221       | Acute myeloid leukemia                              | 64                   | 0.0463                | 21.6125                 | 0.0454         | <i>RARA</i>             |
| hsa04920       | Adipocytokine signaling pathway                     | 68                   | 0.0492                | 20.3412                 | 0.0482         | <i>CPT1A</i>            |
| hsa03320       | PPAR signaling pathway                              | 72                   | 0.0521                | 19.2111                 | 0.0510         | <i>CPT1A</i>            |
| hsa04928       | Parathyroid hormone synthesis, secretion and action | 101                  | 0.0730                | 13.6950                 | 0.0709         | <i>MMP16</i>            |
| hsa04922       | Glucagon signaling pathway                          | 102                  | 0.0737                | 13.5608                 | 0.0716         | <i>CPT1A</i>            |
| hsa04659       | Th17 cell differentiation                           | 105                  | 0.0759                | 13.1733                 | 0.0737         | <i>RARA</i>             |

BC, breast cancer; DNAm, DNA methylation; HER2/neu neg, human epidermal growth factor receptor 2, negative; PBMCs, peripheral blood mononuclear cells; TCGA, The Cancer Genome Atlas; WHI, Women's Health Initiative.

Table S5.10. Gene set analysis using GLAD4U v. 2.5: diseases with enrichment of genes that display differential DNAm shared by PBMCs (in WHI) and BC tissues (in TCGA) among HER2/neu neg types

| GeneSet     | Description                        | Gene set size | Expected value | Enrichment ratio | p value | Overlapped genes       |
|-------------|------------------------------------|---------------|----------------|------------------|---------|------------------------|
| PA153619780 | Sitosterolemia                     | 6             | 0.0034         | 298.1458         | 0.0033  | <i>ABCG1</i>           |
| PA166048726 | Nutritional and Metabolic Diseases | 683           | 0.3818         | 7.8574           | 0.0051  | <i>ABCG1;CPT1A;POR</i> |
| PA445547    | Reye Syndrome                      | 11            | 0.0061         | 162.6250         | 0.0061  | <i>CPT1A</i>           |
| PA445812    | Tangier Disease                    | 14            | 0.0078         | 127.7768         | 0.0078  | <i>ABCG1</i>           |
| PA443286    | Adrenal Hyperplasia, Congenital    | 22            | 0.0123         | 81.3125          | 0.0122  | <i>POR</i>             |
| PA446836    | Craniofacial Abnormalities         | 319           | 0.1783         | 11.2155          | 0.0127  | <i>RARA;POR</i>        |
| PA165108302 | Pulmonary alveolar proteinosis     | 23            | 0.0129         | 77.7772          | 0.0128  | <i>ABCG1</i>           |
| PA166128121 | cardiotoxicity                     | 23            | 0.0129         | 77.7772          | 0.0128  | <i>POR</i>             |
| PA165108566 | Adrenogenital syndrome NOS         | 26            | 0.0145         | 68.8029          | 0.0144  | <i>POR</i>             |
| PA444432    | Hepatic Encephalopathy             | 27            | 0.0151         | 66.2546          | 0.0150  | <i>CPT1A</i>           |

BC, breast cancer; DNAm, DNA methylation; HER2/neu neg, human epidermal growth factor receptor 2, negative; PBMCs, peripheral blood mononuclear cells; TCGA, The Cancer Genome Atlas; WHI, Women's Health Initiative.



Table S5.11. Reactome pathways with enrichment of genes that display differential DNAm shared by PBMCs (in WHI) and BC tissues (in TCGA) across BC types

| <b>GeneSet</b> | <b>Description</b>                         | <b>Gene set size</b> | <b>Expected value</b> | <b>Enrichment ratio</b> | <b>p value</b> | <b>Overlapped genes</b> |
|----------------|--------------------------------------------|----------------------|-----------------------|-------------------------|----------------|-------------------------|
| R-HSA-5362517  | Signaling by Retinoic Acid                 | 42                   | 0.0376                | 53.2381                 | 0.0006         | <i>RARA;CPT1A</i>       |
| R-HSA-163765   | ChREBP activates metabolic gene expression | 8                    | 0.0072                | 139.7500                | 0.0071         | <i>ACLY</i>             |
| R-HSA-9020933  | Interleukin-23 signaling                   | 9                    | 0.0081                | 124.2222                | 0.0080         | <i>TYK2</i>             |
| R-HSA-112411   | MAPK1 (ERK2) activation                    | 9                    | 0.0081                | 124.2222                | 0.0080         | <i>TYK2</i>             |
| R-HSA-8964058  | HDL remodeling                             | 10                   | 0.0089                | 111.8000                | 0.0089         | <i>ABCG1</i>            |
| R-HSA-110056   | MAPK3 (ERK1) activation                    | 10                   | 0.0089                | 111.8000                | 0.0089         | <i>TYK2</i>             |
| R-HSA-8978868  | Fatty acid metabolism                      | 167                  | 0.1494                | 13.3892                 | 0.0091         | <i>ACLY;CPT1A</i>       |
| R-HSA-9020956  | Interleukin-27 signaling                   | 11                   | 0.0098                | 101.6364                | 0.0098         | <i>TYK2</i>             |
| R-HSA-1059683  | Interleukin-6 signaling                    | 11                   | 0.0098                | 101.6364                | 0.0098         | <i>TYK2</i>             |
| R-HSA-8984722  | Interleukin-35 Signalling                  | 12                   | 0.0107                | 93.1667                 | 0.0107         | <i>TYK2</i>             |

BC, breast cancer; DNAm, DNA methylation; PBMCs, peripheral blood mononuclear cells; TCGA, The Cancer Genome Atlas; WHI, Women's Health Initiative.

Figure S1. Mean difference in DNAm levels of selected CpGs across chromosome, CpG context, enhancer and/or promoter, and gene region, stratified by IR status. (CpG, CpG dinucleotide; DNAm, DNA methylation; FG and FI, fasting levels of glucose and insulin; HOMA-IR, homeostatic model assessment-insulin resistance; TSS200, 0–200 bp upstream of transcription start site; TSS1500, 200–1500 bp upstream of transcription start site; UTR, untranslated region. Note: CpGs were selected with a mean difference of > 5% in DNAm by IR. \* Statistical significance after multiple comparison correction.)

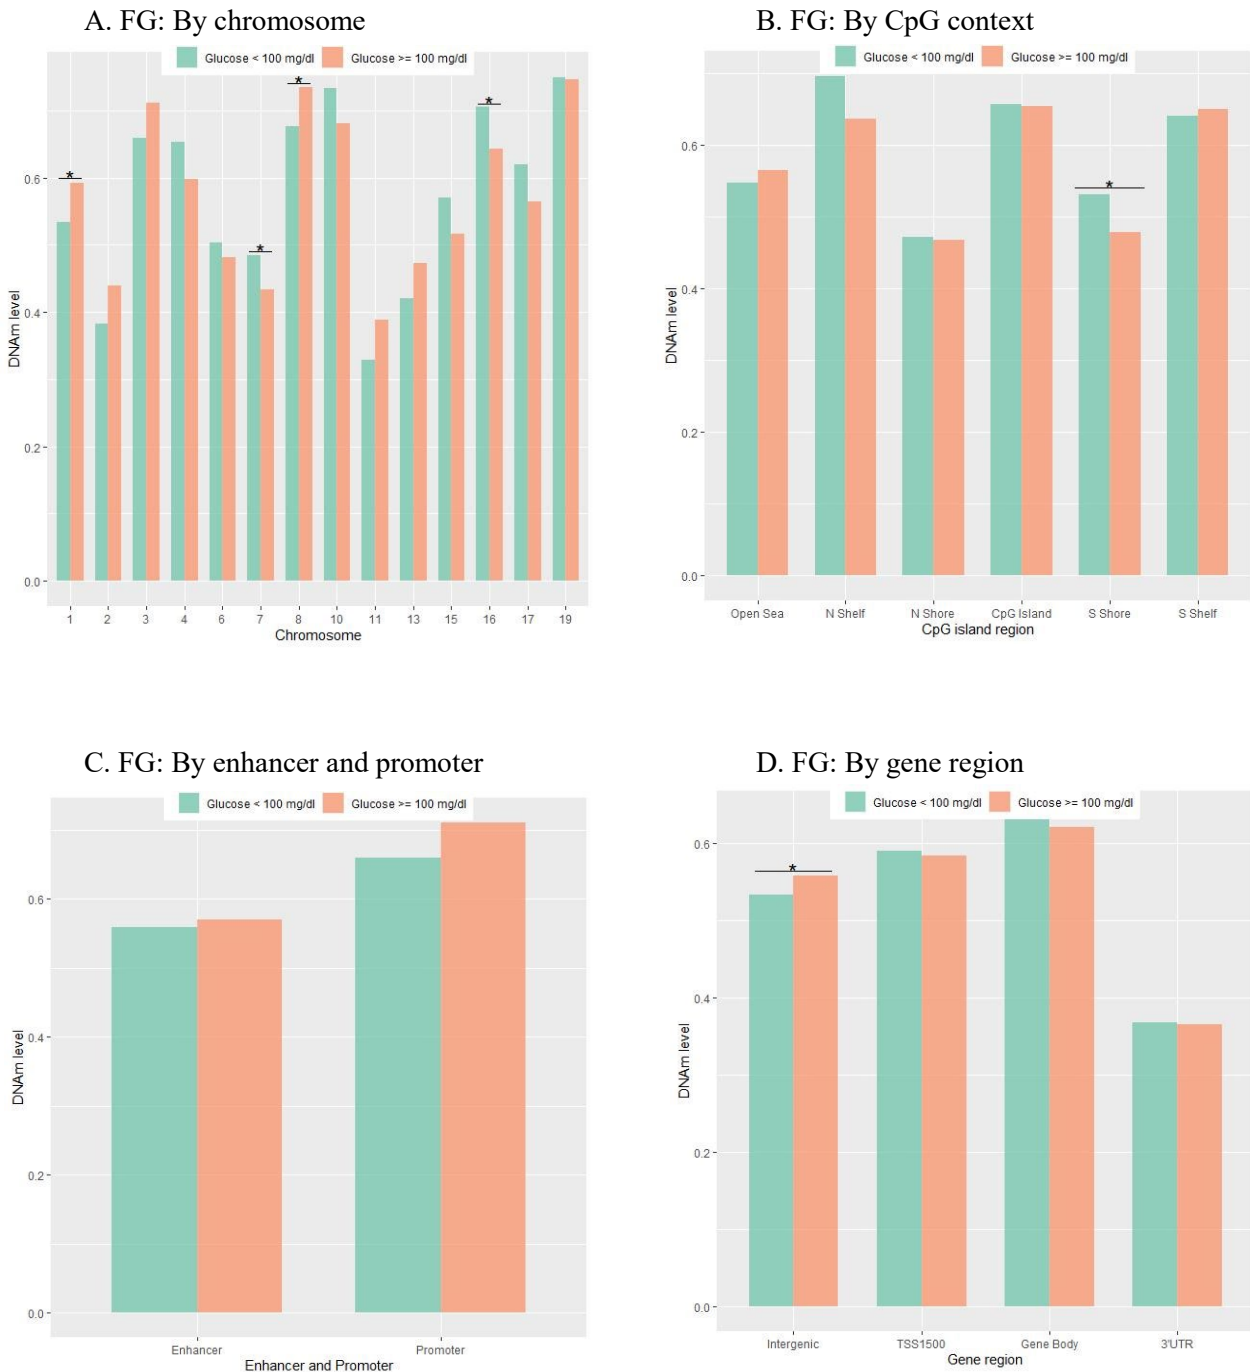

E. FI: By chromosome

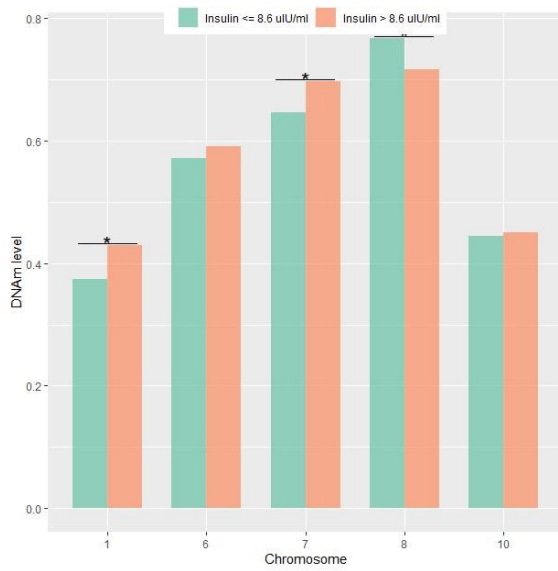

F. FI: By CpG context

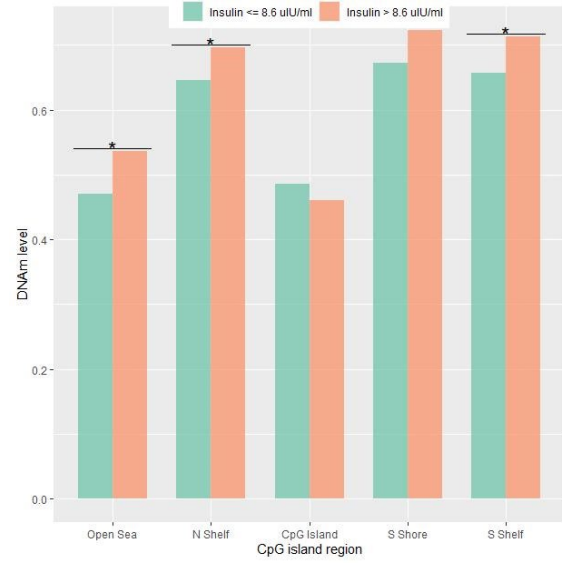

G. FI: By enhancer and promoter

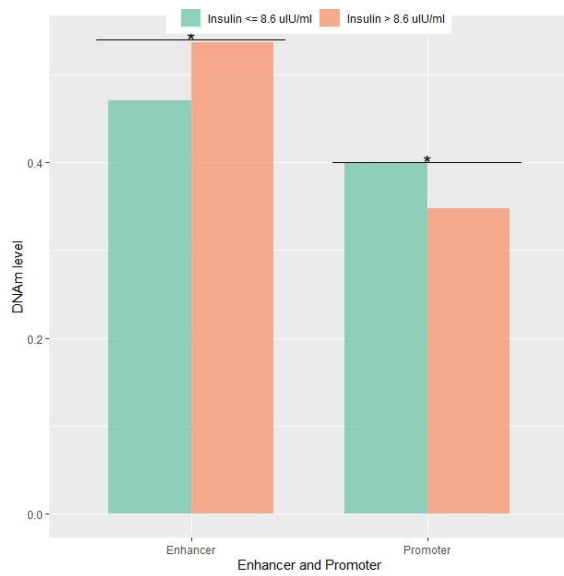

H. FI: By gene region

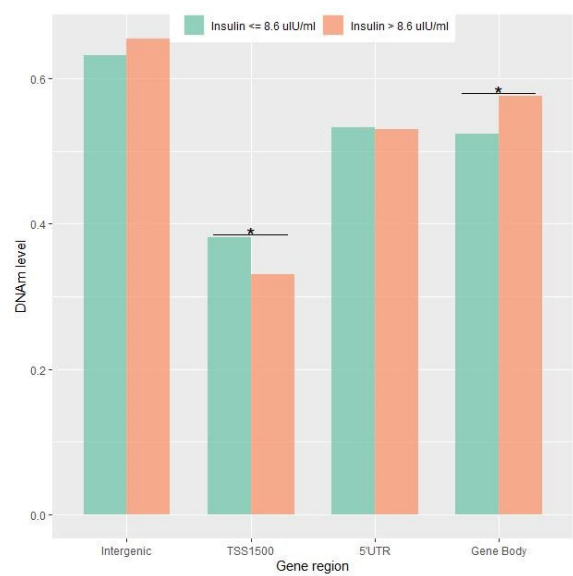

I. HOMA-IR: By chromosome

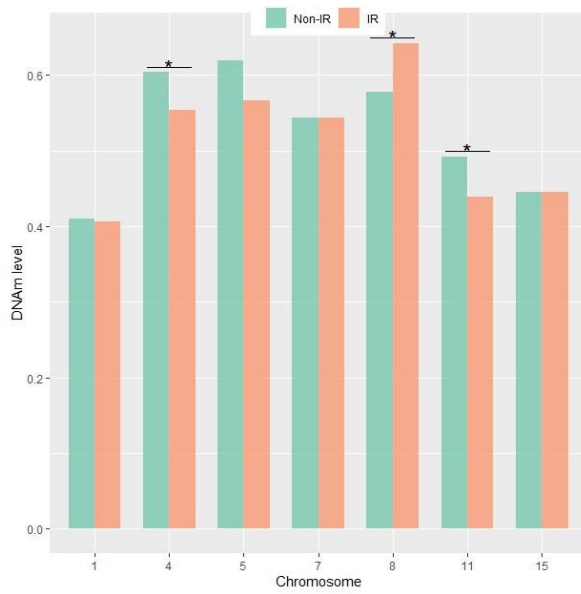

J. HOMA-IR: By CpG context

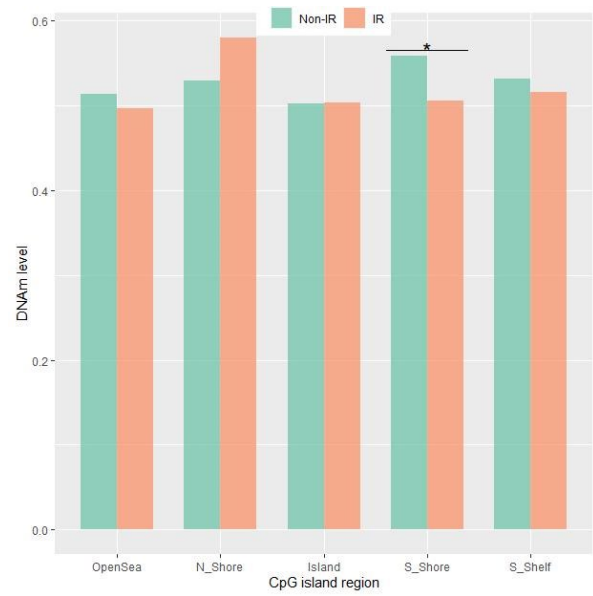

K. HOMA-IR: By enhancer and promoter

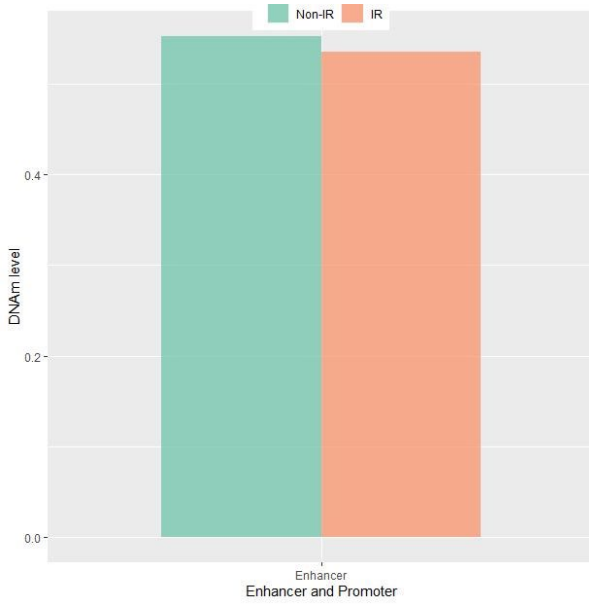

L. HOMA-IR: By gene region

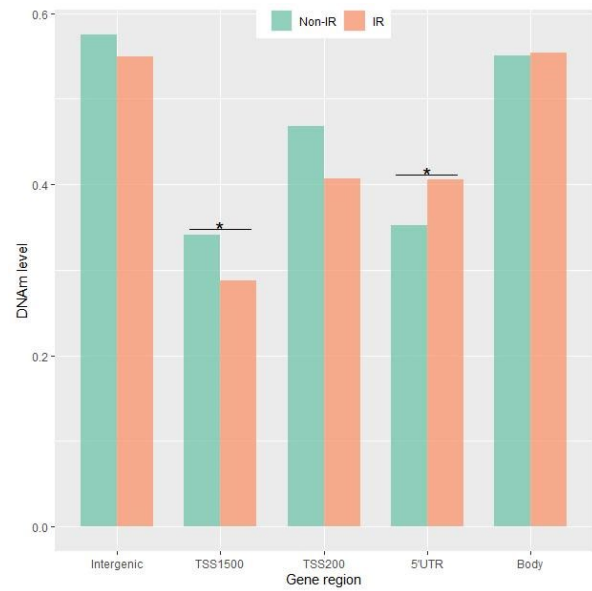

Figure S2. Box plots for DNAm levels of selected genes that are significantly different by BC status in the WHI data. (BC, breast cancer; CpG, CpG dinucleotide; DNAm, DNA methylation; ER/PR pos, estrogen receptor/progesterone receptor-positive; EWA, epigenome-wide association; HER2/neu neg, human epidermal growth factor receptor-2-negative; IR, insulin resistance; WHI, Women’s Health Initiative. Note: DNAm of each gene comprises that of relevant EWA IR-CpGs in association with BC risk. \* Statistical significance.)

A. Among HER2/neu neg: *CPT1A*

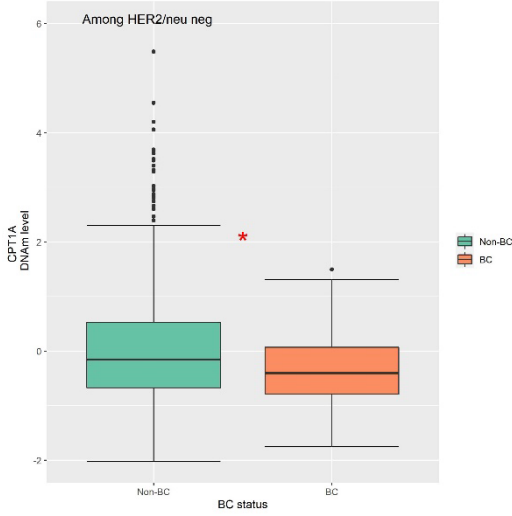

B. Overall: *WDR8*

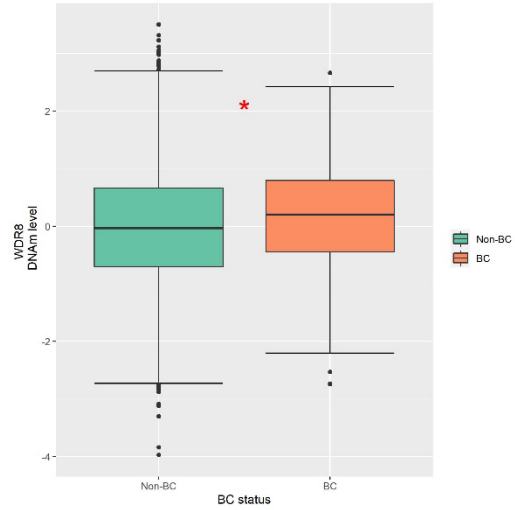

C. Among ER/PR pos: *WDR8*

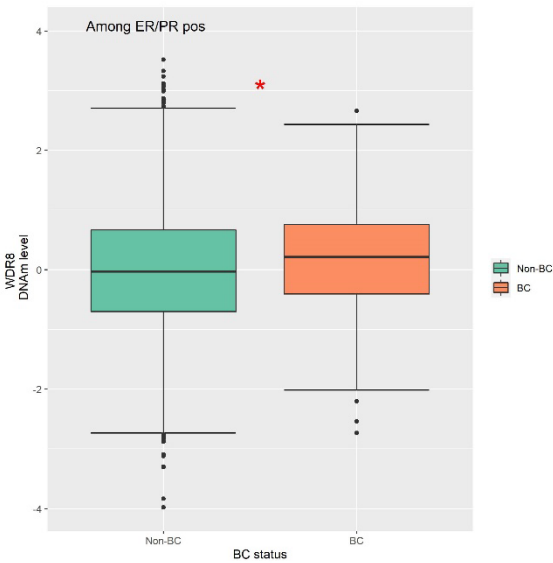

D. Among HER2/neu neg: *WDR8*

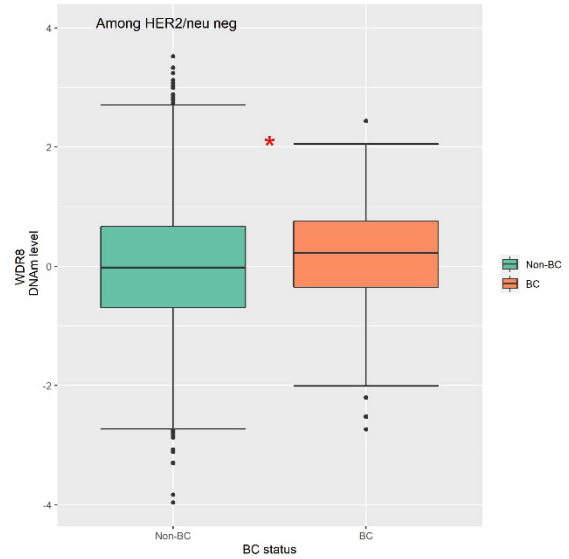

Figure S3. Box plots for DNAm levels of selected genes that are significantly different by BC status in the TCGA data. (BC, breast cancer; CpG, CpG dinucleotide; DNAm, DNA methylation; ER/PR pos, estrogen receptor/progesterone receptor–positive; EWA, epigenome-wide association; HER2/neu neg, human epidermal growth factor receptor-2–negative; IR, insulin resistance; TCGA, the Cancer Genomic Atlas. Note: DNAm of each gene comprises that of relevant EWA IR-CpGs in association with BC risk. \* Statistical significance.)

A. Overall: *ACLY*

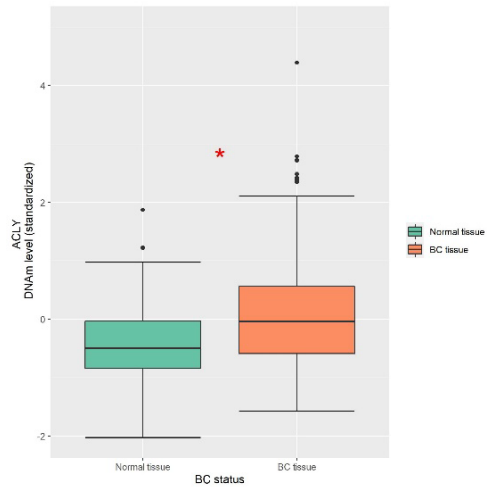

B. Among ER/PR pos: *ACLY*

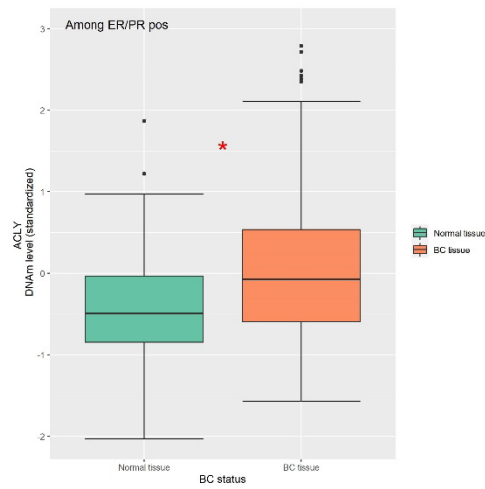

C. Among HER2/neu neg: *ACLY*

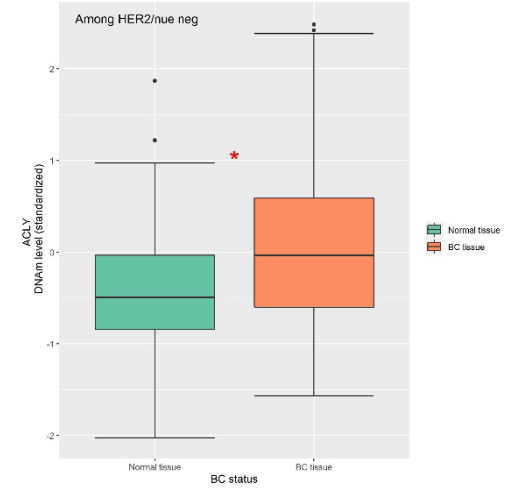

D. Overall: *ABCG1*

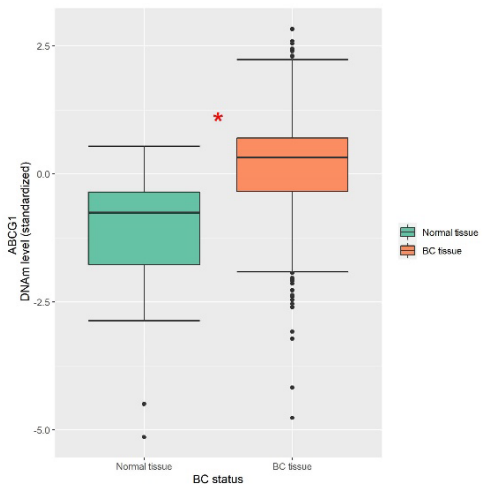

E. Among HER2/neu pos: *ABCG1*

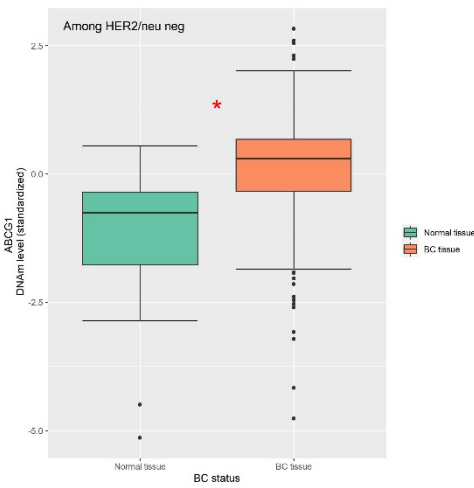

F. Among ER/PR pos: *CPSF4L*

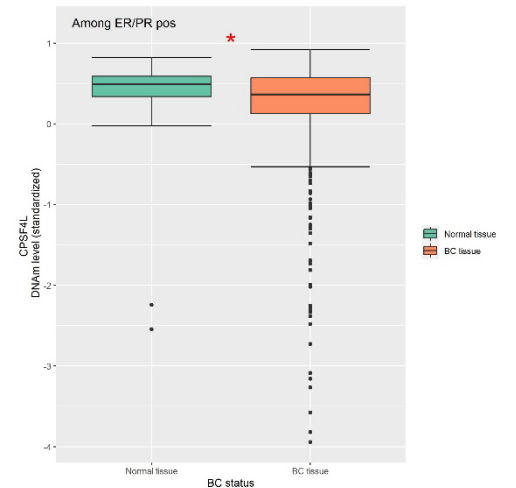

G. Overall: *GAS2L3*

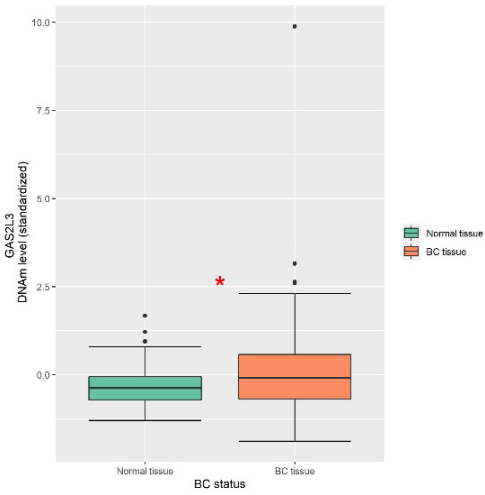

H. Among ER/PR pos: *GAS2L3*

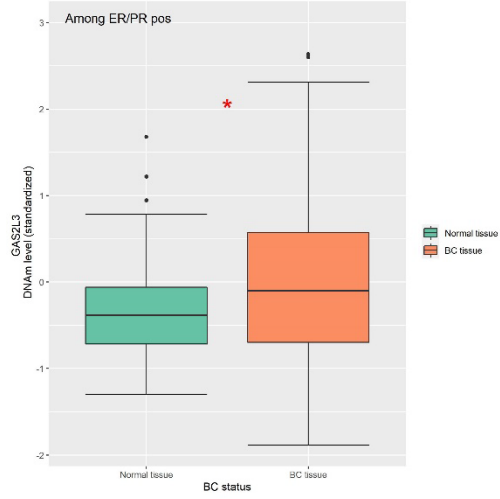

I. Among HER2/neu neg: *GAS2L3*

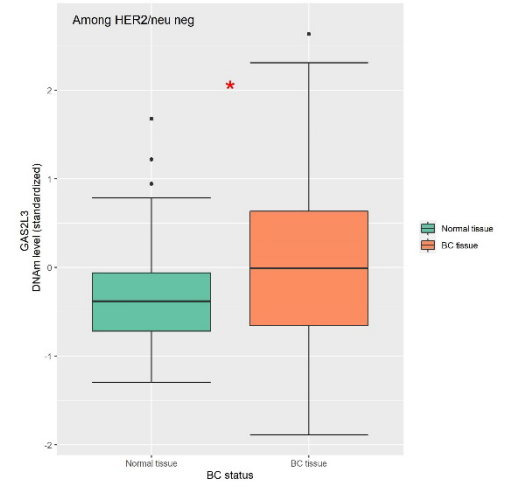

J. Overall: *PRKRA*

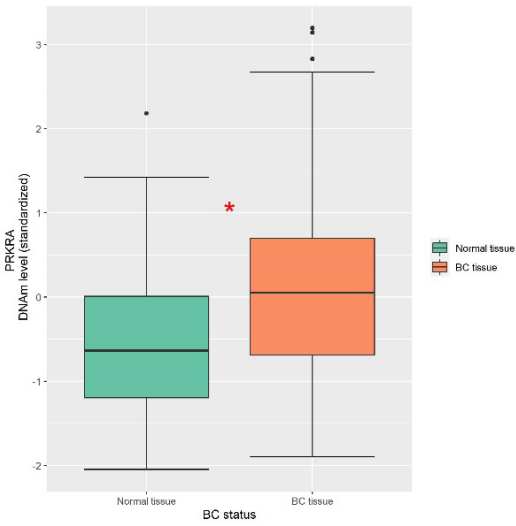

K. Among ER/PR pos: *PRKRA*

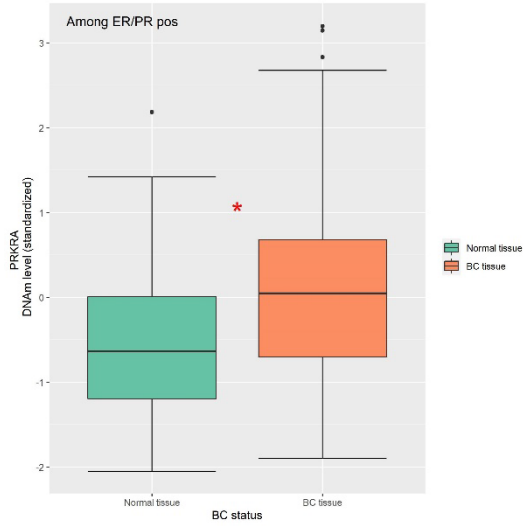

L. Among HER2/neu neg: *PRKRA*

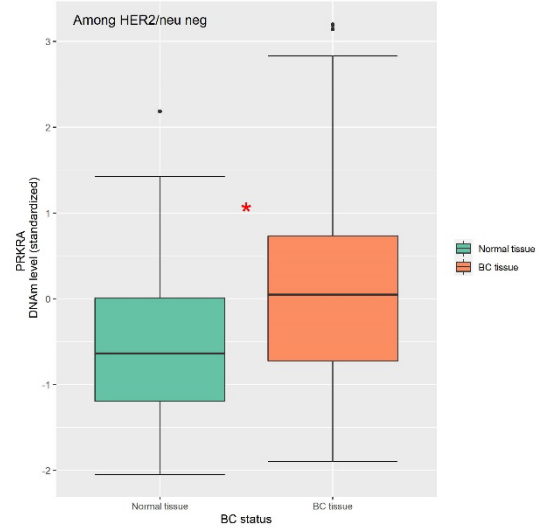

M. Overall: *SH3BP4*

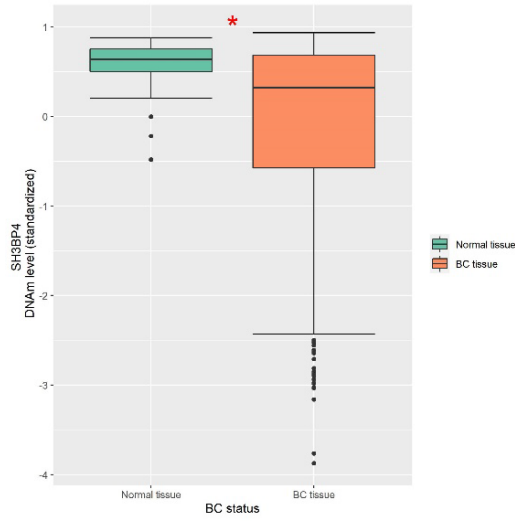

N. Among ER/PR pos: *SH3BP4*

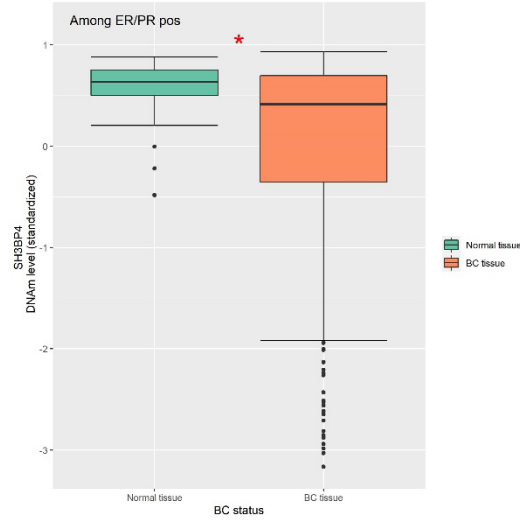

O. Among HER2/neu neg: *SH3BP4*

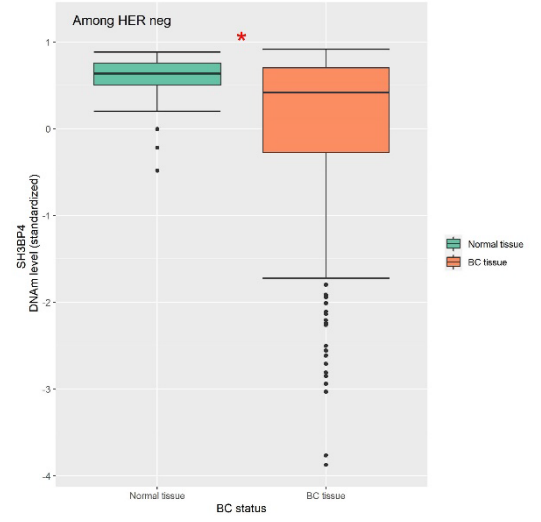

P. Among ER/PR pos: *NKPD1*

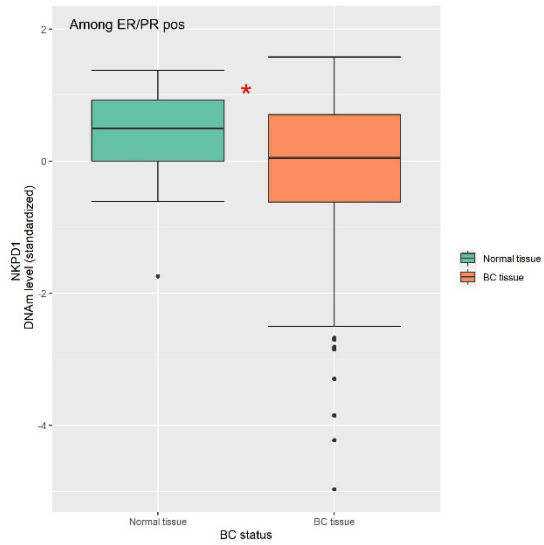

Q. Among ER/PR pos: *TRRAP*

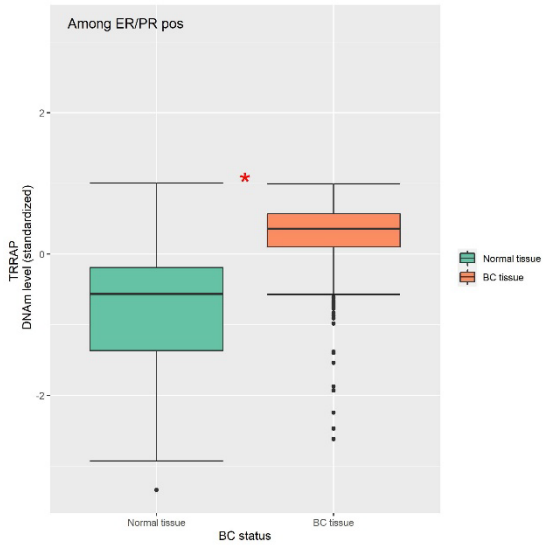

R. Among ER/PR pos: *CALHM1*

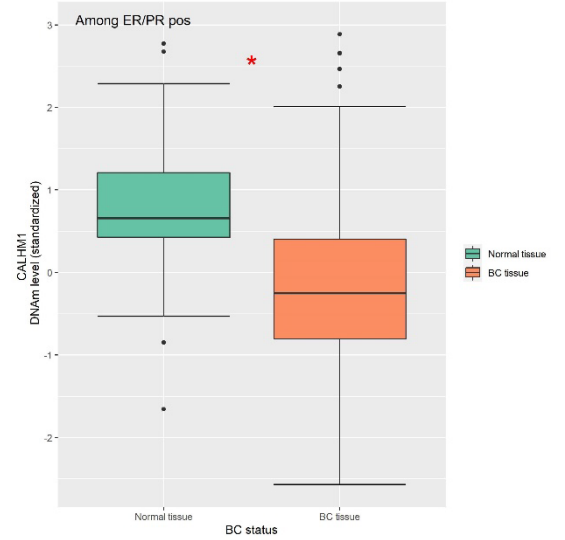



Figure S4. Box plots for DNAm levels from EWA IR-CpGs in association with BC, shared by non-BC datasets according to Chr, CpG context, and gene region. (BC, breast cancer; Chr, chromosome; CpG, CpG dinucleotide; DNAm, DNA methylation; EWA, epigenome-wide association; IR, insulin resistance; TCGA, The Cancer Genomic Atlas; UTR, untranslated region; WHI, Women's Health Initiative. \* Statistical significance after multiple comparison correction.)

A. By Chr

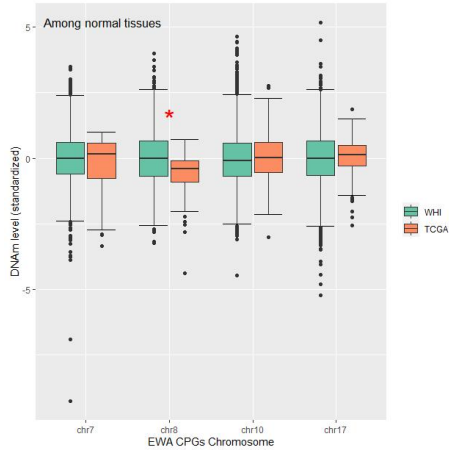

B. By gene region

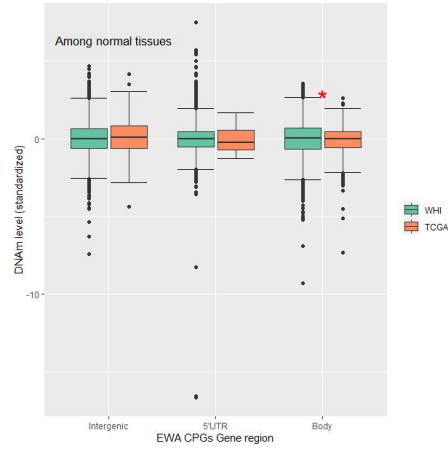

C. By CpG context

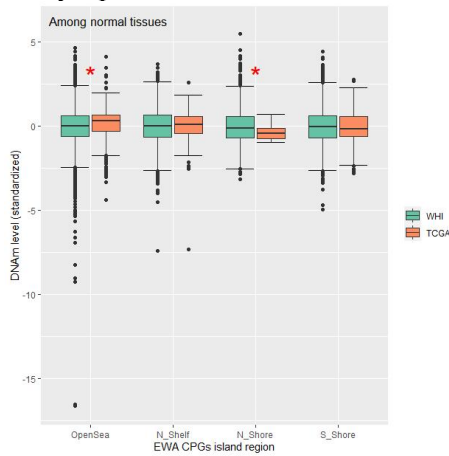

D. By enhancer

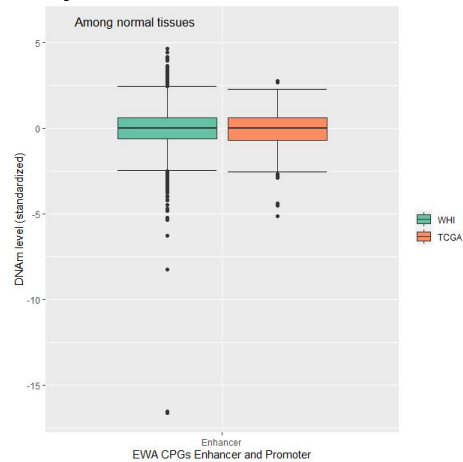

E. By 1 CpG (cg01676795)

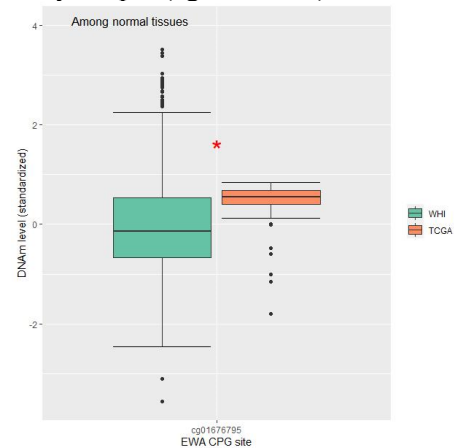

Supplement: 13148_2023_1435_MOESM1_ESM.pdf [file 13148_2023_1435_MOESM1_ESM.pdf]
